# Supplementary material
Source: bioRxiv or medRxiv preprint supplement (http://medrxiv.stage.highwire.org/highwire/filestream/84097/field_highwire_adjunct_files/6/2020.05.29.20116525-7.pdf)
Supplement: Supplementary file [file 2020.05.29.20116525-7.pdf]

**E-TABLE 7: Number of missing values per variable among 13 to 17-year-olds from the LuftiBus in the school study.**

|                                   | n   | (%)  |
|-----------------------------------|-----|------|
| Sex                               | 0   | (0)  |
| Age                               | 0   | (0)  |
| Overweight or obese               | 26  | (2)  |
| Socioeconomic position index      | 332 | (21) |
| Urbanisation degree               | 0   | (0)  |
| Children's questionnaire          |     |      |
| Paternal current smoking          | 31  | (2)  |
| Maternal current smoking          | 35  | (2)  |
| Cough apart from colds            | 5   | (0)  |
| Cough more than others            | 30  | (2)  |
| Rhinitis apart from colds         | 23  | (1)  |
| Dry mouth often when waking-up    | 33  | (2)  |
| Dyspnoea                          | 1   | (0)  |
| Wheeze                            | 35  | (2)  |
| Exercise triggered wheeze         | 11  | (1)  |
| Hay fever                         | 4   | (0)  |
| Asthma diagnosis ever             | 29  | (2)  |
| Parental questionnaire            | 264 | (17) |
| Sport apart from school           | 280 | (18) |
| Physical activity                 | 288 | (18) |
| Child country of birth            | 274 | (17) |
| Father country of origin          | 286 | (18) |
| Mother country of origin          | 283 | (18) |
| Highest paternal education        | 746 | (47) |
| Highest maternal education        | 727 | (46) |
| Maternal smoking during pregnancy | 284 | (18) |
| Parental history of asthma        | 287 | (18) |
